# Supplementary material for: Bioactive Compounds from the Red Sea Marine Sponge Hyrtios Species
Source: MDPI journal article supplement (doi:10.3390/md11041061), 2013-03-28
Supplement: s1 [file s1]

marinedrugs-11-01061-s001.mol
  corina  04151404293D 1   1.00000     0.00000 
CORINA 3.49 0023  12.04.2013
 27 31  0  0  0  0  0  0  0  0999 V2000
   -0.0166    1.4627    0.0721 C   0  0  0  0  0  0  0  0  0  0  0  0
    0.0027   -0.0046    0.0353 C   0  0  0  0  0  0  0  0  0  0  0  0
    1.3246    1.8791    0.0420 C   0  0  0  0  0  0  0  0  0  0  0  0
    2.1292    0.7546   -0.0098 N   0  0  0  0  0  0  0  0  0  0  0  0
    1.3517   -0.3897   -0.0147 C   0  0  0  0  0  0  0  0  0  0  0  0
   -1.0393    2.4103    0.1312 C   0  0  0  0  0  0  0  0  0  0  0  0
   -0.7275    3.7557    0.1533 C   0  0  0  0  0  0  0  0  0  0  0  0
    0.6015    4.1663    0.1163 C   0  0  0  0  0  0  0  0  0  0  0  0
    1.6189    3.2394    0.0667 C   0  0  0  0  0  0  0  0  0  0  0  0
    1.6607   -1.7463   -0.0574 C   0  0  0  0  0  0  0  0  0  0  0  0
    0.7144   -2.6605   -0.0515 N   0  0  0  0  0  0  0  0  0  0  0  0
   -0.5774   -2.3517   -0.0051 C   0  0  0  0  0  0  0  0  0  0  0  0
   -0.9882   -1.0058    0.0404 C   0  0  0  0  0  0  0  0  0  0  0  0
   -1.5890   -3.4278   -0.0017 C   0  0  0  0  0  0  0  0  0  0  0  0
   -1.6474   -4.5843   -0.9129 C   0  0  0  0  0  0  0  0  0  0  0  0
   -2.7765   -5.3248   -0.5255 C   0  0  0  0  0  0  0  0  0  0  0  0
   -3.3568   -4.6672    0.5381 N   0  0  0  0  0  0  0  0  0  0  0  0
   -2.6440   -3.5476    0.8460 C   0  0  0  0  0  0  0  0  0  0  0  0
   -0.8575   -5.0177   -1.9762 C   0  0  0  0  0  0  0  0  0  0  0  0
   -1.1835   -6.1656   -2.6423 C   0  0  0  0  0  0  0  0  0  0  0  0
   -2.3009   -6.9058   -2.2658 C   0  0  0  0  0  0  0  0  0  0  0  0
   -3.0954   -6.4912   -1.2134 C   0  0  0  0  0  0  0  0  0  0  0  0
   -2.6128   -8.0453   -2.9382 O   0  0  0  0  0  0  0  0  0  0  0  0
   -1.7221    4.6814    0.2109 O   0  0  0  0  0  0  0  0  0  0  0  0
   -2.4140   -0.6545    0.0924 C   0  0  0  0  0  0  0  0  0  0  0  0
   -2.9719   -0.5350    1.1659 O   0  0  0  0  0  0  0  0  0  0  0  0
   -3.1037   -0.4647   -1.0505 O   0  0  0  0  0  0  0  0  0  0  0  0
  1  2  1  0      
  1  3  2  0      
  3  4  1  0      
  4  5  1  0      
  5  2  2  0      
  1  6  1  0      
  6  7  2  0      
  7  8  1  0      
  8  9  2  0      
  9  3  1  0      
  5 10  1  0      
 10 11  2  0      
 11 12  1  0      
 12 13  2  0      
 13  2  1  0      
 12 14  1  0      
 14 15  1  0      
 15 16  2  0      
 16 17  1  0      
 17 18  1  0      
 18 14  2  0      
 15 19  1  0      
 19 20  2  0      
 20 21  1  0      
 21 22  2  0      
 22 16  1  0      
 21 23  1  0      
  7 24  1  0      
 13 25  1  0      
 25 26  2  0      
 25 27  1  0      
M  STY  1   1 SUP
M  SLB  1   1   1
M  SAL   1  3  25  26  27
M  SBL   1  1  29
M  SMT   1 COOH
M  SBV   1 29   -7.5583    5.1258
M  END
$$$$
