# Supplementary material for: Bioactive Compounds from the Red Sea Marine Sponge Hyrtios Species
Source: MDPI journal article supplement (doi:10.3390/md11041061), 2013-03-28
Supplement: s2 [file s2]

marinedrugs-11-01061-s001.mol
  ChemDraw03101420482D

 27 31  0  0  0  0  0  0  0  0999 V2000
   -1.8709   -0.6557    0.0000 C   0  0  0  0  0  0  0  0  0  0  0  0
   -1.0459   -0.6557    0.0000 C   0  0  0  0  0  0  0  0  0  0  0  0
   -2.1258   -1.4403    0.0000 C   0  0  0  0  0  0  0  0  0  0  0  0
   -1.4584   -1.9253    0.0000 N   0  0  0  0  0  0  0  0  0  0  0  0
   -0.7909   -1.4403    0.0000 C   0  0  0  0  0  0  0  0  0  0  0  0
   -2.3246   -0.0370    0.0000 C   0  0  0  0  0  0  0  0  0  0  0  0
   -3.2299   -0.2141    0.0000 C   0  0  0  0  0  0  0  0  0  0  0  0
   -3.4848   -0.9988    0.0000 C   0  0  0  0  0  0  0  0  0  0  0  0
   -2.9328   -1.6119    0.0000 C   0  0  0  0  0  0  0  0  0  0  0  0
    0.0160   -1.6119    0.0000 C   0  0  0  0  0  0  0  0  0  0  0  0
    0.5681   -0.9988    0.0000 N   0  0  0  0  0  0  0  0  0  0  0  0
    0.3131   -0.2141    0.0000 C   0  0  0  0  0  0  0  0  0  0  0  0
   -0.4477   -0.0576    0.0000 C   0  0  0  0  0  0  0  0  0  0  0  0
    1.0166    0.4787    0.0000 C   0  0  0  0  0  0  0  0  0  0  0  0
    1.8210    0.7055    0.0000 C   0  0  0  0  0  0  0  0  0  0  0  0
    1.8210    1.5099    0.0000 C   0  0  0  0  0  0  0  0  0  0  0  0
    1.0579    1.8193    0.0000 N   0  0  0  0  0  0  0  0  0  0  0  0
    0.5673    1.1706    0.0000 C   0  0  0  0  0  0  0  0  0  0  0  0
    2.5429    0.3137    0.0000 C   0  0  0  0  0  0  0  0  0  0  0  0
    3.2299    0.6922    0.0000 C   0  0  0  0  0  0  0  0  0  0  0  0
    3.2299    1.5099    0.0000 C   0  0  0  0  0  0  0  0  0  0  0  0
    2.5180    1.9253    0.0000 C   0  0  0  0  0  0  0  0  0  0  0  0
    3.9443    1.9224    0.0000 O   0  0  0  0  0  0  0  0  0  0  0  0
   -3.9443    0.1984    0.0000 O   0  0  0  0  0  0  0  0  0  0  0  0
   -0.8758    0.5264    0.0000 C   0  0  0  0  0  0  0  0  0  0  0  0
   -0.0789    0.3129    0.0000 O   0  0  0  0  0  0  0  0  0  0  0  0
   -1.4591   -0.0570    0.0000 O   0  0  0  0  0  0  0  0  0  0  0  0
  1  2  1  0      
  1  3  2  0      
  3  4  1  0      
  4  5  1  0      
  5  2  2  0      
  1  6  1  0      
  6  7  2  0      
  7  8  1  0      
  8  9  2  0      
  9  3  1  0      
  5 10  1  0      
 10 11  2  0      
 11 12  1  0      
 12 13  2  0      
 13  2  1  0      
 12 14  1  0      
 14 15  1  0      
 15 16  2  0      
 16 17  1  0      
 17 18  1  0      
 18 14  2  0      
 15 19  1  0      
 19 20  2  0      
 20 21  1  0      
 21 22  2  0      
 22 16  1  0      
 21 23  1  0      
  7 24  1  0      
 13 25  1  0      
 25 26  2  0      
 25 27  1  0      
M  STY  1   1 SUP
M  SLB  1   1   1
M  SAL   1  3  25  26  27
M  SBL   1  1  29
M  SMT   1 COOH
M  SBV   1 29   -7.5583    5.1258
M  END
